# Supplementary material for: A meta-analysis of the validity of the Head-Toes-Knees-Shoulders task in predicting young children's academic performance
Source: Front Psychol. 2023 Jun 20;14:1124235. doi: 10.3389/fpsyg.2023.1124235 (PMC10319628; doi:10.3389/fpsyg.2023.1124235)
Supplement: Supplementary file 5 [file Table_2.XLSX]

## Sheet: Quality Rating Scale Template
Study (each study rated according to the drop down criteria to the right)	The sample and how it was recruited	The general testing procedure	The type of academic data collection instrument (s)	The number of subtests or testing items on the academic instrument (s)	The targeted outcomes assessed by each of the academic instruments, and when applicable, its subscales	The scoring system/procedure of the academic instruments	Total possible score range for the HTKS	Total Number of HTKS Testing Items	The HTKS item scoring procedure (e.g. from 0 incorrect to 2 correct )	The HTKS administration procedure (what the children are instructed to do)	Total Quality Score (0-10 per row sum)
Allan, D. M., Allan, N. P., Lerner, M. D., Farrington, A. L., & Lonigan, C. J. (2015). Identifying unique components of preschool children's self-regulatory skills using executive function tasks and continuous performance tests. Early childhood research quarterly, 32, 40-50.
Ansari, A., Pianta, R. C., Whittaker, J. V., Vitiello, V. E., & Ruzek, E. A. (2020). Persistence and convergence: The end of kindergarten outcomes of pre-K graduates and their nonattending peers. Developmental Psychology, 56(11), 2027–2039.
Aram, D., Abiri, S., & Elad, L. (2014). Predicting early spelling: The contribution of children’s early literacy, private speech during spelling, behavioral regulation, and parental spelling support. Reading and Writing, 27(4), 685–707.
Bauer, R. H., Gilpin, A. T., & Thibodeau-Nielsen, R. B. (2021). Executive functions and imaginative play: Exploring relations with prosocial behaviors using structural equation modeling. Trends in Neuroscience and Education, 25, 100165.
Becker, D. R., McClelland, M. M., Loprinzi, P., & Trost, S. G. (2014). Physical Activity, Self-Regulation, and Early Academic Achievement in Preschool Children. Early Education and Development, 25(1), 56–70
Beisly, A., Kwon, K. A., & Jeon, S. (2020). Executive function and learning behaviors: associations with academic skills among preschoolers. Early Child Development and Care, 190(15), 2469-2483.
Birgisdottir, F., Gestsdottir, S., & Geldhof, G. J. (2020). Early predictors of first and fourth grade reading and math: The role of self-regulation and early literacy skills. Early Childhood Research Quarterly, 53, 507–519.
Cadima, J., Barros, S., Ferreira, T., Serra-Lemos, M., Leal, T., & Verschueren, K. (2019). Bidirectional associations between vocabulary and self-regulation in preschool and their interplay with teacher–child closeness and autonomy support. Early Childhood Research Quarterly, 46, 75–86.
Cadima, J., Gamelas, A. M., McClelland, M., & Peixoto, C. (2015). Associations between early family risk, children’s behavioral regulation, and academic achievement in Portugal. Early Education and Development, 26(5-6), 708–728.
Compagnoni, M., Sieber, V., & Job, V. (2020). My brain needs a break: kindergarteners’ willpower theories are related to behavioral self-regulation. Frontiers in psychology, 3567.
Connor, C. M., Day, S. L., Phillips, B., Sparapani, N., Ingebrand, S. W., McLean, L., Barrus, A., & Kaschak, M. P. (2016). Reciprocal Effects of Self-Regulation, Semantic Knowledge, and Reading Comprehension in Early Elementary School. Child Development, 87(6), 1813–1824.
Distefano, R., Galinsky, E., McClelland, M. M., Zelazo, P. D., & Carlson, S. M. (2018). Autonomy-supportive parenting and associations with child and parent executive function. Journal of Applied Developmental Psychology, 58, 77-85.
Duncan, R. J., McClelland, M. M., & Acock, A. C. (2017). Relations between executive function, behavioral regulation, and achievement: Moderation by family income. Journal of Applied Developmental Psychology, 49, 21–30.
Duran, C. A. K., & Grissmer, D. W. (2020). Choosing immediate over delayed gratification correlates with better school-related outcomes in a sample of children of color from low-income families. Developmental Psychology, 56(6), 1107–1120.
Fuhs, M. W., Farran, D. C., & Nesbitt, K. T. (2015). Prekindergarten children’s executive functioning skills and achievement gains: The utility of direct assessments and teacher ratings. Journal of Educational Psychology, 107(1), 207.
Fuhs, M. W., Nesbitt, K. T., Farran, D. C., & Dong, N. (2014). Longitudinal associations between executive functioning and academic skills across content areas. Developmental Psychology, 50(6), 1698–1709.
Gestsdottir, S., von Suchodoletz, A., Wanless, S. B., Hubert, B., Guimard, P., Birgisdottir, F., Gunzenhauser, C., & McClelland, M. (2014). Early Behavioral Self-Regulation, Academic Achievement, and Gender: Longitudinal Findings From France, Germany, and Iceland. Applied Developmental Science, 18(2), 90–109. (French Sample unique)
Hee, P. J., Xu, Y., & Krieg, A. (2018). Validation of the Head–Toes–Knees–Shoulders task in Native Hawaiian and non-Hawaiian children. Early Childhood Research Quarterly, 44, 192–205.
Hernández, M. M., Eisenberg, N., Valiente, C., Spinrad, T. L., Johns, S. K., Berger, R. H., Silva, K. M., Diaz, A., Gal-Szabo, D. E., Thompson, M. S., & Southworth, J. (2018). Self-Regulation and Academic Measures Across the Early Elementary School Grades: Examining Longitudinal and Bidirectional Associations. Early Education and Development, 29(7), 914–938.
Howard, S. J., & Vasseleu, E. (2020). Self-Regulation and Executive Function Longitudinally Predict Advanced Learning in Preschool. Frontiers in Psychology, 11, 49.
Howard, S. J., Neilsen-Hewett, C., de Rosnay, M., Vasseleu, E., & Melhuish, E. (2019). Evaluating the viability of a structured observational approach to assessing early self-regulation. Early Childhood Research Quarterly, 48, 186–197.
Howard, S. J., Vasseleu, E., Batterham, M., & Neilsen-Hewett, C. (2020). Everyday practices and activities to improve pre-school self-regulation: cluster RCT evaluation of the PRSIST program. Frontiers in Psychology, 11, 137.
Hubert, B., Guimard, P., Florin, A., & Tracy, A. (2015). Indirect and Direct Relationships Between Self-Regulation and Academic Achievement During the Nursery/Elementary School Transition of French Students. Early Education and Development, 26(5-6), 685–707.
Hur, E., Buettner, C. K., & Jeon, L. (2015). The Association Between Teachers’ Child-Centered Beliefs and Children’s Academic Achievement: The Indirect Effect of Children’s Behavioral Self-regulation. In Child & Youth Care Forum (Vol. 44, Issue 2, pp. 309–325). https://doi.org/10.1007/s10566-014-9283-9
Ivrendi, A. (2011). Influence of self-regulation on the development of children’s number sense. Early Childhood Education Journal, 39(4), 239–247.
Jacob, L., Benick, M., Dörrenbächer, S., & Perels, F. (2020). Promoting self-regulated learning in preschoolers. Journal of Childhood, Education & Society, 1(2), 116-140.
Keown, L. J., Franke, N., & Triggs, C. M. (2020). An evaluation of a classroom-based intervention to improve executive functions in 4-year old children in New Zealand. Early Childhood Education Journal, 48(5), 621–631.n Evaluation of a Classroom-Based Intervention to Improve Executive Functions in 4-Year Old Children in New Zealand. Early Childhood Education Journal, 1-11.
Lan, X., Legare, C. H., Ponitz, C. C., Li, S., & Morrison, F. J. (2011). Investigating the links between the subcomponents of executive function and academic achievement: A cross-cultural analysis of Chinese and American preschoolers. Journal of experimental child psychology, 108(3), 677-692. SAMPLE 2
Lenes, R., McClelland, M. M., ten Braak, D., Idsøe, T., & Størksen, I. (2020). Direct and indirect pathways from children’s early self-regulation to academic achievement in fifth grade in Norway. Early Childhood Research Quarterly, 53, 612-624.
Lipscomb, S. T., Hatfield, B., Lewis, H., Goka-Dubose, E., & Abshire, C. (2021). Adverse childhood experiences and children's development in early care and education programs. Journal of Applied Developmental Psychology, 72, 101218.
Liu, C., Chung, K. K. H., & Fung, W. K. (2019). Bidirectional relationships between children’s executive functioning, visual skills, and word reading ability during the transition from kindergarten to primary school. Contemporary Educational Psychology, 59, 101779.
Liu, Y., Sun, H., Lin, D., Li, H., Yeung, S. S. S., & Wong, T. T. Y. (2018). The unique role of executive function skills in predicting Hong Kong kindergarteners’ reading comprehension. British Journal of Educational Psychology, 88(4), 628-644.
Malone, S. A., Burgoyne, K., & Hulme, C. (2020). Number knowledge and the approximate number system are two critical foundations for early arithmetic development. Journal of Educational Psychology, 112(6), 1167.
Martins, E. C., Osório, A., Veríssimo, M., & Martins, C. (2016). Emotion understanding in preschool children: The role of executive functions. International Journal of Behavioral Development, 40(1), 1–10.
Matthews, J. S., Ponitz, C. C., & Morrison, F. J. (2009). Early gender differences in self-regulation and academic achievement. Journal of Educational Psychology, 101(3), 689.
McClelland, M. M., & Wanless, S. B. (2012). Growing up with assets and risks: The importance of self-regulation for academic achievement. Research in Human Development, 9(4), 278-297.
McClelland, M. M., Gonzales, C. R., Cameron, C. E., Geldhof, G. J., Bowles, R. P., Nancarrow, A. F., ... & Tracy, A. (2021). The Head-Toes-Knees-Shoulders revised: Links to academic outcomes and measures of EF in young children. Frontiers in Psychology, 12.
McClelland, M. M., Tominey, S. L., Schmitt, S. A., Hatfield, B. E., Purpura, D. J., Gonzales, C. R., & Tracy, A. N. (2019). Red Light, Purple Light! Results of an Intervention to Promote School Readiness for Children From Low-Income Backgrounds. Frontiers in Psychology, 10, 2365.
Mills, B., Dyer, N., Pacheco, D., Brinkley, D., Owen, M. T., & Caughy, M. O. (2019). Developmental Transactions Between Self‐Regulation and Academic Achievement Among Low‐Income African American and Latino Children. Child Development, 90(5), 1614–1631.
Montoya, M. F., Susperreguy, M. I., Dinarte, L., Morrison, F. J., San Martín, E., Rojas-Barahona, C. A., & Förster, C. E. (2019). Executive function in Chilean preschool children: Do short-term memory, working memory, and response inhibition contribute differentially to early academic skills? Early Childhood Research Quarterly, 46, 187–200.
Montroy, J. J., Bowles, R. P., & Skibbe, L. E. (2016). The effect of peers’ self-regulation on preschooler's self-regulation and literacy growth. Journal of Applied Developmental Psychology, 46, 73–83.
Özer, S. (2016). Behavioral Regulation, Visual Spatial Maturity in Kindergarten, and the Relationship of School Adaptation in the First Grade for a Sample of Turkish Children. Psychological Reports, 118(2), 353–371 (sample 2)
Pianta, R. C., Whittaker, J. E., Vitiello, V., Ruzek, E., Ansari, A., Hofkens, T., & DeCoster, J. (2020/01//Jan-Feb, 2020). Children’s school readiness skills across the pre-K year: Associations with teacher-student interactions, teacher practices, and exposure to academic content. Journal of Applied Developmental Psychology, 66. https://doi.org/10.1016/j.appdev.2019.101084
Reilly, S. E., & Downer, J. T. (2019). Roles of executive functioning and language in developing low-income preschoolers’ behavior and emotion regulation. Early childhood research quarterly, 49, 229-240.
Ren, L., Cheung, R. Y., Boise, C., Li, X., & Fan, J. (2020). Fathers’ perceived co-parenting and children's academic readiness among Chinese preschoolers: Longitudinal pathways through parenting and behavioral regulation. Early Childhood Research Quarterly, 53, 77-85.
Rowles, S. P., & Mills, C. M. (2019). “Is it worth my time and effort?”: How children selectively gather information from experts when faced with different kinds of costs. Journal of Experimental Child Psychology, 179, 308-323.
Russo, J. M., Williford, A. P., Markowitz, A. J., Vitiello, V. E., & Bassok, D. (2019). Examining the validity of a widely-used school readiness assessment: Implications for teachers and early childhood programs. Early Childhood Research Quarterly, 48, 14–25.
Schmitt, S. A., Duncan, R. J., Budrevich, A., & Korucu, I. (2020). Benefits of behavioral self-regulation in the context of high classroom quality for preschoolers’ mathematics. Early Education and Development, 31(3), 323-334.
Schmitt, S. A., Finders, J. K., Duncan, R. J., Korucu, I., Bryant, L. M., Purpura, D. J., & Elicker, J. G. (2021). Examining transactional relations between behavioral self-regulation and social-emotional functioning during the transition to kindergarten. Developmental Psychology, 57(12), 2093.
Schmitt, S. A., Geldhof, G. J., Purpura, D. J., Duncan, R., & McClelland, M. M. (2017). Examining the relations between executive function, math, and literacy during the transition to kindergarten: A multi-analytic approach. Journal of Educational Psychology, 109(8), 1120.
Schmitt, S. A., Korucu, I., Napoli, A. R., Bryant, L. M., & Purpura, D. J. (2018). Using block play to enhance preschool children’s mathematics and executive functioning: A randomized controlled trial. Early Childhood Research Quarterly, 44, 181–191.
Schmitt, S. A., McClelland, M. M., Tominey, S. L., & Acock, A. C. (2015). Strengthening school readiness for Head Start children: Evaluation of a self-regulation intervention. Early Childhood Research Quarterly, 30, 20–31.
Schwarz, M., & Shaul, S. (2018). Towards a better understanding of the link between executive functions, early literacy, and emergent mathematical abilities. Written Language and Literacy, 21(2), 238–268.
Shaul, S., & Schwartz, M. (2014). The role of the executive functions in school readiness among preschool-age children. Reading and Writing, 27(4), 749–768.
Skibbe, L. E., Hindman, A. H., Connor, C. M., Housey, M., & Morrison, F. J. (2013). Relative Contributions of Pre-Kindergarten and Kindergarten to Children’s Literacy and Mathematics Skills. Early Education and Development, 24(5), 687–703.
ten Braak, D., Kleemans, T., Størksen, I., Verhoeven, L., & Segers, E. (2018). Domain-specific effects of attentional and behavioral control in early literacy and numeracy development. Learning and Individual Differences, 68, 61–71.
Traverso, L., Viterbori, P., Gandolfi, E., Zanobini, M., & Usai, M. C. (2022). The contribution of inhibitory control to early literacy skills in 4‐to 5‐year‐old children. Early Childhood Research Quarterly, 59, 265-286.
Valcan, D. S., Davis, H. L., Pino-Pasternak, D., & Malpique, A. A. (2020). Executive functioning as a predictor of children’s mathematics, reading and writing. Journal of Applied Developmental Psychology, 70(101196), 101196.
van der Graaf, J., Segers, E., & Verhoeven, L. (2018). Individual differences in the development of scientific thinking in kindergarten. Learning and Instruction, 56, 1–9.
von Salisch, M., Haenel, M., & Denham, S. A. (2015). Self-regulation, language skills, and emotion knowledge in young children from northern Germany. Early Education and Development, 26(5-6), 792-806.
Von Suchodoletz, A., & Gunzenhauser, C. (2013). Behavior regulation and early math and vocabulary knowledge in German preschool children. Early Education and Development, 24(3), 310–331.
von Suchodoletz, A., Barza, L., & Larsen, R. A. A. (2020). Examination of teacher–child interactions in early childhood education programmes in the United Arab Emirates. International Journal of Early Years Education, 28(1), 6–21.
von Suchodoletz, A., Gestsdottir, S., Wanless, S. B., McClelland, M. M., Birgisdottir, F., Gunzenhauser, C., & Ragnarsdottir, H. (2013). Behavioral self-regulation and relations to emergent academic skills among children in Germany and Iceland. Early Childhood Research Quarterly, 28(1), 62-73. sample 3
Von Suchodoletz, A., Uka, F., & Larsen, R. A. (2015). Self-regulation across different contexts: Findings in young Albanian children. Early Education and Development, 26(5-6), 829–846.
Wanless, S. B., Kim, K. H., Zhang, C., Degol, J. L., Chen, J. L., & Chen, F. M. (2016). Trajectories of behavioral regulation for Taiwanese children from 3.5 to 6 years and relations to math and vocabulary outcomes. Early Childhood Research Quarterly, 34, 104–114.
Wanless, S. B., McClelland, M. M., Acock, A. C., Ponitz, C. C., Son, S.-H., Lan, X., Morrison, F. J., Chen, J.-L., Chen, F.-M., Lee, K., Sung, M., & Li, S. (2011). Measuring behavioral regulation in four societies. Psychological Assessment, 23(2), 364–378. Sample 4
Zhang, L., & Rao, N. (2017). Effortful Control and Academic Achievement in Rural China. Early Education and Development, 28(5), 541–558.
Zhang, X. (2018). Letter-name knowledge longitudinally predicts young Chinese children’s Chinese word reading and number competencies in a multilingual context. Learning and Individual Differences, 65, 176–186.
Zhang, X., Hu, B. Y., Ren, L., & Fan, X. (2018). Sources of individual differences in young Chinese children’s reading and mathematics skill: A longitudinal study. Journal of School Psychology, 71, 122–137.

## Sheet:  Total Quality Score For Each S
Study	Total Quality Rating Score (0 to 10 per row sum)
Allan, D. M., Allan, N. P., Lerner, M. D., Farrington, A. L., & Lonigan, C. J. (2015). Identifying unique components of preschool children's self-regulatory skills using executive function tasks and continuous performance tests. Early childhood research quarterly, 32, 40-50.	8
Ansari, A., Pianta, R. C., Whittaker, J. V., Vitiello, V. E., & Ruzek, E. A. (2020). Persistence and convergence: The end of kindergarten outcomes of pre-K graduates and their nonattending peers. Developmental Psychology, 56(11), 2027–2039.	6
Aram, D., Abiri, S., & Elad, L. (2014). Predicting early spelling: The contribution of children’s early literacy, private speech during spelling, behavioral regulation, and parental spelling support. Reading and Writing, 27(4), 685–707.	9
Bauer, R. H., Gilpin, A. T., & Thibodeau-Nielsen, R. B. (2021). Executive functions and imaginative play: Exploring relations with prosocial behaviors using structural equation modeling. Trends in Neuroscience and Education, 25, 100165.	10
Becker, D. R., McClelland, M. M., Loprinzi, P., & Trost, S. G. (2014). Physical Activity, Self-Regulation, and Early Academic Achievement in Preschool Children. Early Education and Development, 25(1), 56–70	10
Beisly, A., Kwon, K. A., & Jeon, S. (2020). Executive function and learning behaviors: associations with academic skills among preschoolers. Early Child Development and Care, 190(15), 2469-2483.	7
Birgisdottir, F., Gestsdottir, S., & Geldhof, G. J. (2020). Early predictors of first and fourth grade reading and math: The role of self-regulation and early literacy skills. Early Childhood Research Quarterly, 53, 507–519.	10
Cadima, J., Barros, S., Ferreira, T., Serra-Lemos, M., Leal, T., & Verschueren, K. (2019). Bidirectional associations between vocabulary and self-regulation in preschool and their interplay with teacher–child closeness and autonomy support. Early Childhood Research Quarterly, 46, 75–86.	10
Cadima, J., Gamelas, A. M., McClelland, M., & Peixoto, C. (2015). Associations between early family risk, children’s behavioral regulation, and academic achievement in Portugal. Early Education and Development, 26(5-6), 708–728.	10
Compagnoni, M., Sieber, V., & Job, V. (2020). My brain needs a break: kindergarteners’ willpower theories are related to behavioral self-regulation. Frontiers in psychology, 3567.	10
Connor, C. M., Day, S. L., Phillips, B., Sparapani, N., Ingebrand, S. W., McLean, L., Barrus, A., & Kaschak, M. P. (2016). Reciprocal Effects of Self-Regulation, Semantic Knowledge, and Reading Comprehension in Early Elementary School. Child Development, 87(6), 1813–1824.	7
Distefano, R., Galinsky, E., McClelland, M. M., Zelazo, P. D., & Carlson, S. M. (2018). Autonomy-supportive parenting and associations with child and parent executive function. Journal of Applied Developmental Psychology, 58, 77-85.	10
Duncan, R. J., McClelland, M. M., & Acock, A. C. (2017). Relations between executive function, behavioral regulation, and achievement: Moderation by family income. Journal of Applied Developmental Psychology, 49, 21–30.	9
Duran, C. A. K., & Grissmer, D. W. (2020). Choosing immediate over delayed gratification correlates with better school-related outcomes in a sample of children of color from low-income families. Developmental Psychology, 56(6), 1107–1120.	6
Fuhs, M. W., Farran, D. C., & Nesbitt, K. T. (2015). Prekindergarten children’s executive functioning skills and achievement gains: The utility of direct assessments and teacher ratings. Journal of Educational Psychology, 107(1), 207.	9
Fuhs, M. W., Nesbitt, K. T., Farran, D. C., & Dong, N. (2014). Longitudinal associations between executive functioning and academic skills across content areas. Developmental Psychology, 50(6), 1698–1709.	10
Gestsdottir, S., von Suchodoletz, A., Wanless, S. B., Hubert, B., Guimard, P., Birgisdottir, F., Gunzenhauser, C., & McClelland, M. (2014). Early Behavioral Self-Regulation, Academic Achievement, and Gender: Longitudinal Findings From France, Germany, and Iceland. Applied Developmental Science, 18(2), 90–109. (French Sample unique)	9
Hee, P. J., Xu, Y., & Krieg, A. (2018). Validation of the Head–Toes–Knees–Shoulders task in Native Hawaiian and non-Hawaiian children. Early Childhood Research Quarterly, 44, 192–205.	8
Hernández, M. M., Eisenberg, N., Valiente, C., Spinrad, T. L., Johns, S. K., Berger, R. H., Silva, K. M., Diaz, A., Gal-Szabo, D. E., Thompson, M. S., & Southworth, J. (2018). Self-Regulation and Academic Measures Across the Early Elementary School Grades: Examining Longitudinal and Bidirectional Associations. Early Education and Development, 29(7), 914–938.	10
Howard, S. J., & Vasseleu, E. (2020). Self-Regulation and Executive Function Longitudinally Predict Advanced Learning in Preschool. Frontiers in Psychology, 11, 49.	9
Howard, S. J., Neilsen-Hewett, C., de Rosnay, M., Vasseleu, E., & Melhuish, E. (2019). Evaluating the viability of a structured observational approach to assessing early self-regulation. Early Childhood Research Quarterly, 48, 186–197.	9
Howard, S. J., Vasseleu, E., Batterham, M., & Neilsen-Hewett, C. (2020). Everyday practices and activities to improve pre-school self-regulation: cluster RCT evaluation of the PRSIST program. Frontiers in Psychology, 11, 137.	10
Hubert, B., Guimard, P., Florin, A., & Tracy, A. (2015). Indirect and Direct Relationships Between Self-Regulation and Academic Achievement During the Nursery/Elementary School Transition of French Students. Early Education and Development, 26(5-6), 685–707.	10
Hur, E., Buettner, C. K., & Jeon, L. (2015). The Association Between Teachers’ Child-Centered Beliefs and Children’s Academic Achievement: The Indirect Effect of Children’s Behavioral Self-regulation. In Child & Youth Care Forum (Vol. 44, Issue 2, pp. 309–325). https://doi.org/10.1007/s10566-014-9283-9	8
Ivrendi, A. (2011). Influence of self-regulation on the development of children’s number sense. Early Childhood Education Journal, 39(4), 239–247.	9
Jacob, L., Benick, M., Dörrenbächer, S., & Perels, F. (2020). Promoting self-regulated learning in preschoolers. Journal of Childhood, Education & Society, 1(2), 116-140.	9
Keown, L. J., Franke, N., & Triggs, C. M. (2020). An evaluation of a classroom-based intervention to improve executive functions in 4-year old children in New Zealand. Early Childhood Education Journal, 48(5), 621–631.n Evaluation of a Classroom-Based Intervention to Improve Executive Functions in 4-Year Old Children in New Zealand. Early Childhood Education Journal, 1-11.	8
Lan, X., Legare, C. H., Ponitz, C. C., Li, S., & Morrison, F. J. (2011). Investigating the links between the subcomponents of executive function and academic achievement: A cross-cultural analysis of Chinese and American preschoolers. Journal of experimental child psychology, 108(3), 677-692. SAMPLE 2	10
Lenes, R., McClelland, M. M., ten Braak, D., Idsøe, T., & Størksen, I. (2020). Direct and indirect pathways from children’s early self-regulation to academic achievement in fifth grade in Norway. Early Childhood Research Quarterly, 53, 612-624.	9
Lipscomb, S. T., Hatfield, B., Lewis, H., Goka-Dubose, E., & Abshire, C. (2021). Adverse childhood experiences and children's development in early care and education programs. Journal of Applied Developmental Psychology, 72, 101218.	8
Liu, C., Chung, K. K. H., & Fung, W. K. (2019). Bidirectional relationships between children’s executive functioning, visual skills, and word reading ability during the transition from kindergarten to primary school. Contemporary Educational Psychology, 59, 101779.	8
Liu, Y., Sun, H., Lin, D., Li, H., Yeung, S. S. S., & Wong, T. T. Y. (2018). The unique role of executive function skills in predicting Hong Kong kindergarteners’ reading comprehension. British Journal of Educational Psychology, 88(4), 628-644.	10
Malone, S. A., Burgoyne, K., & Hulme, C. (2020). Number knowledge and the approximate number system are two critical foundations for early arithmetic development. Journal of Educational Psychology, 112(6), 1167.	10
Martins, E. C., Osório, A., Veríssimo, M., & Martins, C. (2016). Emotion understanding in preschool children: The role of executive functions. International Journal of Behavioral Development, 40(1), 1–10.	9
Matthews, J. S., Ponitz, C. C., & Morrison, F. J. (2009). Early gender differences in self-regulation and academic achievement. Journal of Educational Psychology, 101(3), 689.	10
McClelland, M. M., & Wanless, S. B. (2012). Growing up with assets and risks: The importance of self-regulation for academic achievement. Research in Human Development, 9(4), 278-297.	10
McClelland, M. M., Gonzales, C. R., Cameron, C. E., Geldhof, G. J., Bowles, R. P., Nancarrow, A. F., ... & Tracy, A. (2021). The Head-Toes-Knees-Shoulders revised: Links to academic outcomes and measures of EF in young children. Frontiers in Psychology, 12.	10
McClelland, M. M., Tominey, S. L., Schmitt, S. A., Hatfield, B. E., Purpura, D. J., Gonzales, C. R., & Tracy, A. N. (2019). Red Light, Purple Light! Results of an Intervention to Promote School Readiness for Children From Low-Income Backgrounds. Frontiers in Psychology, 10, 2365.	10
Mills, B., Dyer, N., Pacheco, D., Brinkley, D., Owen, M. T., & Caughy, M. O. (2019). Developmental Transactions Between Self‐Regulation and Academic Achievement Among Low‐Income African American and Latino Children. Child Development, 90(5), 1614–1631.	9
Montoya, M. F., Susperreguy, M. I., Dinarte, L., Morrison, F. J., San Martín, E., Rojas-Barahona, C. A., & Förster, C. E. (2019). Executive function in Chilean preschool children: Do short-term memory, working memory, and response inhibition contribute differentially to early academic skills? Early Childhood Research Quarterly, 46, 187–200.	7
Montroy, J. J., Bowles, R. P., & Skibbe, L. E. (2016). The effect of peers’ self-regulation on preschooler's self-regulation and literacy growth. Journal of Applied Developmental Psychology, 46, 73–83.	10
Özer, S. (2016). Behavioral Regulation, Visual Spatial Maturity in Kindergarten, and the Relationship of School Adaptation in the First Grade for a Sample of Turkish Children. Psychological Reports, 118(2), 353–371 (sample 2)	10
Pianta, R. C., Whittaker, J. E., Vitiello, V., Ruzek, E., Ansari, A., Hofkens, T., & DeCoster, J. (2020/01//Jan-Feb, 2020). Children’s school readiness skills across the pre-K year: Associations with teacher-student interactions, teacher practices, and exposure to academic content. Journal of Applied Developmental Psychology, 66. https://doi.org/10.1016/j.appdev.2019.101084	6
Reilly, S. E., & Downer, J. T. (2019). Roles of executive functioning and language in developing low-income preschoolers’ behavior and emotion regulation. Early childhood research quarterly, 49, 229-240.	10
Ren, L., Cheung, R. Y., Boise, C., Li, X., & Fan, J. (2020). Fathers’ perceived co-parenting and children's academic readiness among Chinese preschoolers: Longitudinal pathways through parenting and behavioral regulation. Early Childhood Research Quarterly, 53, 77-85.	8
Rowles, S. P., & Mills, C. M. (2019). “Is it worth my time and effort?”: How children selectively gather information from experts when faced with different kinds of costs. Journal of Experimental Child Psychology, 179, 308-323.	10
Russo, J. M., Williford, A. P., Markowitz, A. J., Vitiello, V. E., & Bassok, D. (2019). Examining the validity of a widely-used school readiness assessment: Implications for teachers and early childhood programs. Early Childhood Research Quarterly, 48, 14–25.	6
Schmitt, S. A., Duncan, R. J., Budrevich, A., & Korucu, I. (2020). Benefits of behavioral self-regulation in the context of high classroom quality for preschoolers’ mathematics. Early Education and Development, 31(3), 323-334.	9
Schmitt, S. A., Finders, J. K., Duncan, R. J., Korucu, I., Bryant, L. M., Purpura, D. J., & Elicker, J. G. (2021). Examining transactional relations between behavioral self-regulation and social-emotional functioning during the transition to kindergarten. Developmental Psychology, 57(12), 2093.	8
Schmitt, S. A., Geldhof, G. J., Purpura, D. J., Duncan, R., & McClelland, M. M. (2017). Examining the relations between executive function, math, and literacy during the transition to kindergarten: A multi-analytic approach. Journal of Educational Psychology, 109(8), 1120.	10
Schmitt, S. A., Korucu, I., Napoli, A. R., Bryant, L. M., & Purpura, D. J. (2018). Using block play to enhance preschool children’s mathematics and executive functioning: A randomized controlled trial. Early Childhood Research Quarterly, 44, 181–191.	9
Schmitt, S. A., McClelland, M. M., Tominey, S. L., & Acock, A. C. (2015). Strengthening school readiness for Head Start children: Evaluation of a self-regulation intervention. Early Childhood Research Quarterly, 30, 20–31.	9
Schwarz, M., & Shaul, S. (2018). Towards a better understanding of the link between executive functions, early literacy, and emergent mathematical abilities. Written Language and Literacy, 21(2), 238–268.	10
Shaul, S., & Schwartz, M. (2014). The role of the executive functions in school readiness among preschool-age children. Reading and Writing, 27(4), 749–768.	9
Skibbe, L. E., Hindman, A. H., Connor, C. M., Housey, M., & Morrison, F. J. (2013). Relative Contributions of Pre-Kindergarten and Kindergarten to Children’s Literacy and Mathematics Skills. Early Education and Development, 24(5), 687–703.	9
ten Braak, D., Kleemans, T., Størksen, I., Verhoeven, L., & Segers, E. (2018). Domain-specific effects of attentional and behavioral control in early literacy and numeracy development. Learning and Individual Differences, 68, 61–71.	9
Traverso, L., Viterbori, P., Gandolfi, E., Zanobini, M., & Usai, M. C. (2022). The contribution of inhibitory control to early literacy skills in 4‐to 5‐year‐old children. Early Childhood Research Quarterly, 59, 265-286.	9
Valcan, D. S., Davis, H. L., Pino-Pasternak, D., & Malpique, A. A. (2020). Executive functioning as a predictor of children’s mathematics, reading and writing. Journal of Applied Developmental Psychology, 70(101196), 101196.	8
van der Graaf, J., Segers, E., & Verhoeven, L. (2018). Individual differences in the development of scientific thinking in kindergarten. Learning and Instruction, 56, 1–9.	9
von Salisch, M., Haenel, M., & Denham, S. A. (2015). Self-regulation, language skills, and emotion knowledge in young children from northern Germany. Early Education and Development, 26(5-6), 792-806.	10
Von Suchodoletz, A., & Gunzenhauser, C. (2013). Behavior regulation and early math and vocabulary knowledge in German preschool children. Early Education and Development, 24(3), 310–331.	10
von Suchodoletz, A., Barza, L., & Larsen, R. A. A. (2020). Examination of teacher–child interactions in early childhood education programmes in the United Arab Emirates. International Journal of Early Years Education, 28(1), 6–21.	7
von Suchodoletz, A., Gestsdottir, S., Wanless, S. B., McClelland, M. M., Birgisdottir, F., Gunzenhauser, C., & Ragnarsdottir, H. (2013). Behavioral self-regulation and relations to emergent academic skills among children in Germany and Iceland. Early Childhood Research Quarterly, 28(1), 62-73. sample 3	8
Von Suchodoletz, A., Uka, F., & Larsen, R. A. (2015). Self-regulation across different contexts: Findings in young Albanian children. Early Education and Development, 26(5-6), 829–846.	8
Wanless, S. B., Kim, K. H., Zhang, C., Degol, J. L., Chen, J. L., & Chen, F. M. (2016). Trajectories of behavioral regulation for Taiwanese children from 3.5 to 6 years and relations to math and vocabulary outcomes. Early Childhood Research Quarterly, 34, 104–114.	8
Wanless, S. B., McClelland, M. M., Acock, A. C., Ponitz, C. C., Son, S.-H., Lan, X., Morrison, F. J., Chen, J.-L., Chen, F.-M., Lee, K., Sung, M., & Li, S. (2011). Measuring behavioral regulation in four societies. Psychological Assessment, 23(2), 364–378. Sample 4	8
Zhang, L., & Rao, N. (2017). Effortful Control and Academic Achievement in Rural China. Early Education and Development, 28(5), 541–558.	9
Zhang, X. (2018). Letter-name knowledge longitudinally predicts young Chinese children’s Chinese word reading and number competencies in a multilingual context. Learning and Individual Differences, 65, 176–186.	8
Zhang, X., Hu, B. Y., Ren, L., & Fan, X. (2018). Sources of individual differences in young Chinese children’s reading and mathematics skill: A longitudinal study. Journal of School Psychology, 71, 122–137.	9
